# Supplementary material for: Tolerance of two anhydrobiotic tardigrades Echiniscus testudo and Milnesium inceptum to hypomagnetic conditions
Source: PeerJ. 2021 Feb 2;9:e10630. doi: 10.7717/peerj.10630 (PMC7863786; doi:10.7717/peerj.10630)
Supplement: Supplemental Information 1 — Temperature data used to calculate the average temperature inside the CIMF chamber. The table contains temperature data for 10:00 am and 10:00 pm, each day in every 24-day period (3 days of desiccation time period and 21 days of experimental time), for experiments I–III carried out on bothEch. testudo and Mil. inceptum. [file peerj-09-10630-s001.xlsx]

## Sheet: Arkusz1
date	hour 10:00:00	hour 22:00:00
2018-04-21	24	24.7
2018-04-22	23.4	24.4
2018-04-23	23.6	24.5
2018-04-24	23.6	23.6
2018-04-25	23.2	23.6
2018-04-26	22.8	23.1
2018-04-27	22.3	23
2018-04-28	22.6	23.9
2018-04-29	23.2	24.6
2018-04-30	23.8	24.8
2018-05-01	23.6	24.2
2018-05-02	22.9	23.3
2018-05-03	23	23.8
2018-05-04	22.5	23.3
2018-05-05	22.1	23.3
2018-05-06	22.1	23.3
2018-05-07	22.6	23.8
2018-05-08	23.1	24.5
2018-05-09	23.8	24.9
2018-05-10	24.3	25.2
2018-05-11	24.5	24.9
2018-05-12	24.1	25.1
2018-05-13	24.1	25
2018-05-14	24.3	24.9
2018-11-17	23.6	24.6
2018-11-18	23.6	23.6
2018-11-19	23.6	23.6
2018-11-20	23.6	23.6
2018-11-21	23.8	24.1
2018-11-22	23.6	23.8
2018-11-23	23.6	23.6
2018-11-24	23.6	23.8
2018-11-25	23.7	23.6
2018-11-26	23.6	23.4
2018-11-27	23.2	23.4
2018-11-28	23.2	23.9
2018-11-29	23.4	23.7
2018-11-30	23.2	24.2
2018-12-01	23.4	23.3
2018-12-02	23.5	24.7
2018-12-03	24	25
2018-12-04	24.6	24.9
2018-12-05	sensor failure	sensor failure
2018-12-06	sensor failure	sensor failure
2018-12-07	sensor failure	sensor failure
2018-12-08	sensor failure	sensor failure
2018-12-09	sensor failure	sensor failure
2018-12-10	sensor failure	sensor failure
2020-01-07	23.3	23.9
2020-01-08	23.3	23.9
2020-01-09	23.5	23.4
2020-01-10	23.4	23.8
2020-01-11	23.4	23.3
2020-01-12	22.9	23.2
2020-01-13	23.3	23.7
2020-01-14	23.3	23.4
2020-01-15	23.1	24.1
2020-01-16	23.3	24.2
2020-01-17	23.6	24.3
2020-01-18	23.8	23.8
2020-01-19	23.5	24.1
2020-01-20	23.8	24.1
2020-01-21	23.4	23.8
2020-01-22	23.3	23.9
2020-01-23	23	23.5
2020-01-24	23.2	23.4
2020-01-25	23.1	23.1
2020-01-26	23	22.9
2020-01-27	23	23.8
2020-01-28	23.5	23.6
2020-01-29	23.1	23.4
2020-01-30	23.1	23.4
