# Supplementary material for: Tolerance of two anhydrobiotic tardigrades Echiniscus testudo and Milnesium inceptum to hypomagnetic conditions
Source: PeerJ. 2021 Feb 2;9:e10630. doi: 10.7717/peerj.10630 (PMC7863786; doi:10.7717/peerj.10630)
Supplement: Supplemental Information 3 — The data includes the number of dead individuals, the number of alive individuals and the percentage mortality of the tested replicates. [file peerj-09-10630-s003.xlsx]

## Sheet: Experiment I
Test Group I; dead specimens	Test Group I; live individuals	Test Group I; mortality (%)	Control Group I; dead specimens	Control Group I; live individuals	Control group I; mortality (%)
1	9	10	3	7	30
3	7	30	0	10	0
5	5	50	2	8	20
3	7	30	1	9	10
2	8	20	2	8	20
4	6	40	3	7	30
3	7	30	2	8	20
5	5	50	2	8	20
3	7	30	2	8	20
3	7	30	4	6	40

## Sheet: Experiment II
Test Group II; dead specimens	Test Group II; live individuals	Test Group II; mortality (%)	Control Group II; dead specimens	Control Group II; live individuals	Control group II; mortality (%)
4	6	40	2	8	20
6	4	60	3	7	30
6	4	60	1	9	10
3	7	30	2	8	20
3	7	30	1	9	10
4	6	40	2	8	20
3	7	30	0	10	0
3	7	30	0	10	0
1	9	10	0	10	0
0	10	0	1	9	10

## Sheet: Experiment III
Test Group III; dead specimens	Test Group III; live individuals	Test Group III; mortality (%)	Control Group III; dead specimens	Control Group III; live individuals	Control group III; mortality (%)
5	5	50	5	5	50
6	4	60	1	9	10
7	3	70	2	8	20
7	3	70	3	3	30
8	2	80	2	8	20
6	4	60	3	7	30
5	5	50	3	7	30
7	3	70	3	7	30
6	4	60	2	8	20
4	6	40	4	6	40
