# Supplementary material for: Tolerance of two anhydrobiotic tardigrades Echiniscus testudo and Milnesium inceptum to hypomagnetic conditions
Source: PeerJ. 2021 Feb 2;9:e10630. doi: 10.7717/peerj.10630 (PMC7863786; doi:10.7717/peerj.10630)
Supplement: Supplemental Information 5 — The data includes comparisons between all three experiments I–III and control. The control group in this case, was expressed as the minimum values for each dish from the control groups for experiment. diff, differences between groups; lwr, lower 95% confidence level; upr, upper 95% confidence level; p adj, p value. [file peerj-09-10630-s005.xlsx]

## Sheet: Arkusz1
groups	diff	lwr	upr	p adj
2-1	1	-14.8954	16.89537	0.9982375
3-1	29	13.10464	44.89537	0.0001113
C-1	-25	-40.8954	-9.10464	0.0008337
3-2	28	12.10464	43.89537	0.0001853
C-2	-26	-41.8954	-10.1046	0.0005075
C-3	-54	-69.8954	-38.1046	0.0000000
